# Supplementary material for: The Effect of Manuka Honey on dHL-60 Cytokine, Chemokine, and Matrix-Degrading Enzyme Release under Inflammatory Conditions
Source: PubMed Central journal article supplement (PMC6594701; doi:10.20900/mo.20190005), 2019-04-25
Supplement: NIHMS1026110-supplement-5.pdf [file NIHMS1026110-supplement-5.pdf]

|              |                      | <i>Multiple Comparisons</i> |                      |             |               |                                |            |                                     |                  |                         |
|--------------|----------------------|-----------------------------|----------------------|-------------|---------------|--------------------------------|------------|-------------------------------------|------------------|-------------------------|
|              |                      | <b>Kruskal-Wallis</b>       | <b>Control Cells</b> | <b>fMLP</b> | <b>GM-CSF</b> | <b>IFN-<math>\gamma</math></b> | <b>LPS</b> | <b>IFN-<math>\gamma</math>, LPS</b> | <b>LPS, fMLP</b> | <b>All four stimuli</b> |
| <b>Box A</b> | TNF- $\alpha$        | 0.0003                      | Ref                  | 1           | 1             | 1                              | <0.0001    | <0.0001                             | <0.0001          | <0.0001                 |
| <b>Box B</b> | IL-1 $\beta$         | 0.0818                      | Ref                  | 1           | 1             | 1                              | 0.1355     | 1                                   | 1                | 1                       |
| <b>Box C</b> | MMP-1                | 0.0009                      | Ref                  | 1           | 1             | 1                              | <0.0001    | 0.0001                              | <0.0001          | 0.0012                  |
|              | CCL5/RANTES          | 0.0016                      | Ref                  | 1           | 1             | 1                              | 0.0020     | 0.0261                              | <0.0001          | 0.0010                  |
|              | CCL20/MIP-3 $\alpha$ | 0.0003                      | Ref                  | 1           | 1             | 1                              | <0.0001    | <0.0001                             | <0.0001          | <0.0001                 |
|              | MMP-9                | 1                           | Ref                  | -           | -             | -                              | -          | -                                   | -                | -                       |
|              | IL-12 p70            | 0.4433                      | Ref                  | 1           | 1             | 1                              | 1          | 1                                   | 1                | 1                       |
|              | VEGF                 | 0.0004                      | Ref                  | 0.3320      | 0.0007        | 1                              | <0.0001    | 0.0001                              | <0.0001          | <0.0001                 |
| <b>Box D</b> | CCL3/MIP-1 $\alpha$  | 0.0008                      | Ref                  | 1           | 1             | 1                              | <0.0001    | <0.0001                             | <0.0001          | 0.0008                  |
|              | CCL4/MIP-1 $\beta$   | 0.0003                      | Ref                  | 0.0002      | 1             | 1                              | <0.0001    | <0.0001                             | <0.0001          | <0.0001                 |
|              | FGF-13               | 0.0006                      | Ref                  | 1           | 1             | 1                              | <0.0001    | <0.0001                             | <0.0001          | <0.0001                 |
| <b>Box E</b> | IL-1ra               | 0.0005                      | Ref                  | 1           | 1             | 1                              | <0.0001    | <0.0001                             | <0.0001          | <0.0001                 |
|              | CCL2/MCP-1           | 0.0005                      | Ref                  | 0.0028      | 0.0010        | 1                              | <0.0001    | <0.0001                             | <0.0001          | <0.0001                 |
|              | Proteinase 3         | 0.0196                      | Ref                  | 1           | 1             | 1                              | 1          | 1                                   | 1                | 1                       |
|              | CXCL8/IL-8           | 0.0003                      | Ref                  | <0.0001     | <0.0001       | 0.3740                         | <0.0001    | <0.0001                             | <0.0001          | <0.0001                 |
|              | IL-4                 | 0.0007                      | Ref                  | 1           | 1             | 1                              | <0.0001    | <0.0001                             | 0.0001           | 0.0425                  |

Table S1. P-values for released levels with no honey at 3 hours compared to nonstimulated control cells. A Kruskal-Wallis test was used with a Bonferroni adjustment for multiple comparisons ( $\alpha=0.05$ ).

|              |                      | <i>Multiple Comparisons</i> |                      |             |               |                                |            |                                     |                  |                         |
|--------------|----------------------|-----------------------------|----------------------|-------------|---------------|--------------------------------|------------|-------------------------------------|------------------|-------------------------|
|              |                      | <b>Kruskal-Wallis</b>       | <b>Control Cells</b> | <b>fMLP</b> | <b>GM-CSF</b> | <b>IFN-<math>\gamma</math></b> | <b>LPS</b> | <b>IFN-<math>\gamma</math>, LPS</b> | <b>LPS, fMLP</b> | <b>All four stimuli</b> |
| <b>Box A</b> | TNF- $\alpha$        | 0.0003                      | Ref                  | 1           | 1             | 1                              | <0.0001    | <0.0001                             | <0.0001          | <0.0001                 |
| <b>Box B</b> | IL-1 $\beta$         | 0.0026                      | Ref                  | 1           | 1             | 1                              | 1          | 1                                   | 0.0020           | <0.0001                 |
| <b>Box C</b> | MMP-1                | 0.0004                      | Ref                  | 1           | 0.0104        | 1                              | <0.0001    | <0.0001                             | <0.0001          | <0.0001                 |
|              | CCL5/RANTES          | 0.0003                      | Ref                  | 1           | <0.0001       | 1                              | <0.0001    | <0.0001                             | <0.0001          | <0.0001                 |
|              | CCL20/MIP-3 $\alpha$ | 0.0006                      | Ref                  | 1           | 1             | 1                              | <0.0001    | <0.0001                             | <0.0001          | <0.0001                 |
|              | MMP-9                | 0.0003                      | Ref                  | 0.0029      | 0.2412        | 1                              | <0.0001    | <0.0001                             | <0.0001          | <0.0001                 |
|              | IL-12 p70            | 0.0004                      | Ref                  | 1           | 1             | 1                              | <0.0001    | <0.0001                             | <0.0001          | <0.0001                 |
|              | VEGF                 | 0.0005                      | Ref                  | 1           | <0.0001       | 0.2371                         | 0.0037     | <0.0001                             | <0.0001          | <0.0001                 |
| <b>Box D</b> | CCL3/MIP-1 $\alpha$  | 0.0009                      | Ref                  | 1           | 1             | 1                              | 0.0001     | <0.0001                             | 0.0022           | <0.0001                 |
|              | CCL4/MIP-1 $\beta$   | 0.0003                      | Ref                  | 1           | 0.0013        | 0.4361                         | <0.0001    | <0.0001                             | <0.0001          | <0.0001                 |
|              | FGF-13               | 0.0006                      | Ref                  | 1           | 1             | 1                              | 0.0001     | <0.0001                             | <0.0001          | <0.0001                 |
| <b>Box E</b> | IL-1ra               | 0.0003                      | Ref                  | 0.0529      | <0.0001       | 0.9170                         | <0.0001    | <0.0001                             | <0.0001          | <0.0001                 |
|              | CCL2/MCP-1           | 0.0004                      | Ref                  | 1           | <0.0001       | 0.0222                         | <0.0001    | <0.0001                             | <0.0001          | <0.0001                 |
|              | Proteinase 3         | 0.0065                      | Ref                  | 1           | 0.9395        | 1                              | 1          | 1                                   | 1                | 0.9395                  |
|              | CXCL8/IL-8           | 0.0007                      | Ref                  | 1           | <0.0001       | 1                              | <0.0001    | <0.0001                             | <0.0001          | <0.0001                 |
|              | IL-4                 | 0.0003                      | Ref                  | 1           | <0.0001       | 0.5630                         | <0.0001    | <0.0001                             | <0.0001          | <0.0001                 |

Table S2. P-values for released levels with no honey at 24 hours compared to nonstimulated control cells. A Kruskal-Wallis test was used with a Bonferroni adjustment for multiple comparisons ( $\alpha=0.05$ ).

|              |                      | Control Cells | fMLP   | GM-CSF | IFN- $\gamma$ | LPS    | IFN- $\gamma$ , LPS | LPS, fMLP | All four stimuli |
|--------------|----------------------|---------------|--------|--------|---------------|--------|---------------------|-----------|------------------|
| <b>Box A</b> | TNF- $\alpha$        | 1             | 1      | 1      | 1             | 0.0809 | 0.0809              | 0.0809    | 0.3827           |
| <b>Box B</b> | IL-1 $\beta$         | 1             | 1      | 1      | 1             | 0.3537 | 0.5050              | 0.0636    | 0.0765           |
| <b>Box C</b> | MMP-1                | 0.0469        | 0.6428 | 0.0765 | 0.0593        | 0.0809 | 0.0809              | 0.0765    | 0.0809           |
|              | CCL5/RANTES          | 1             | 0.5050 | 0.0765 | 0.5050        | 0.0809 | 0.0765              | 0.0809    | 0.0809           |
|              | CCL20/MIP-3 $\alpha$ | 1             | 1      | 0.5050 | 0.5050        | 0.0809 | 0.0809              | 0.0809    | 0.0809           |
|              | MMP-9                | 0.0636        | 0.0636 | 0.0636 | 0.0636        | 0.0636 | 0.0636              | 0.0636    | 0.0636           |
|              | IL-12 p70            | 1             | 1      | 0.5050 | 1             | 0.0722 | 0.0593              | 0.0593    | 0.0636           |
|              | VEGF                 | 0.0809        | 0.0809 | 0.0809 | 0.0809        | 0.0809 | 0.0765              | 0.0765    | 0.0809           |
| <b>Box D</b> | CCL3/MIP-1 $\alpha$  | 1             | 0.5050 | 1      | 1             | 0.0809 | 0.0809              | 0.6625    | 0.0809           |
|              | CCL4/MIP-1 $\beta$   | 0.0809        | 0.3827 | 0.0765 | 0.0765        | 0.0809 | 0.0809              | 0.0809    | 0.0809           |
|              | FGF-13               | 1             | 1      | 0.5050 | 1             | 0.0809 | 0.0809              | 0.0765    | 0.0809           |
| <b>Box E</b> | IL-1ra               | 0.6625        | 0.3827 | 0.0809 | 0.0809        | 0.0765 | 0.0809              | 0.0636    | 0.0809           |
|              | CCL2/MCP-1           | 0.0809        | 0.0809 | 0.0636 | 0.0809        | 0.0636 | 0.0636              | 0.0636    | 0.0636           |
|              | Proteinase 3         | 0.0809        | 0.0809 | 0.0636 | 0.0809        | 0.0809 | 0.0809              | 0.0809    | 0.0636           |
|              | CXCL8/IL-8           | 0.6625        | 0.0636 | 0.0636 | 0.0809        | 1      | 1                   | 1         | 1                |
|              | IL-4                 | 0.0593        | 0.0765 | 0.0809 | 0.0636        | 0.0809 | 0.0809              | 0.0809    | 0.0809           |

Table S3. P-values for released levels with no honey at 3 hours compared to 24 hours. Wilcoxon rank sum test was used to test differences between timepoints for each stimulation type ( $\alpha=0.05$ ).

|              |                      | <i>Multiple Comparisons</i> |               |         |           |                  |
|--------------|----------------------|-----------------------------|---------------|---------|-----------|------------------|
|              |                      | Kruskal-Wallis              | Control Cells | LPS     | LPS, fMLP | All four stimuli |
| <b>Box A</b> | TNF- $\alpha$        | 0.0046                      | Ref           | 1       | <0.0001   | 1                |
| <b>Box B</b> | IL-1 $\beta$         | 0.0627                      | Ref           | 1       | 0.6226    | 1                |
|              | CCL20/MIP-3 $\alpha$ | 0.0035                      | Ref           | 0.5273  | 0.0043    | 0.5273           |
|              | CCL5/RANTES          | 0.0047                      | Ref           | 0.4623  | 0.4623    | 1                |
|              | CXCL8/IL-8           | 0.0018                      | Ref           | <0.0001 | <0.0001   | <0.0001          |
|              | Proteinase 3         | 0.0033                      | Ref           | 1       | 1         | 1                |
|              | MMP-1                | 0.0067                      | Ref           | 1       | 0.0011    | 0.0011           |
|              | VEGF                 | 0.0025                      | Ref           | 0.9385  | <0.0001   | 1                |
| <b>Box C</b> | FGF-13               | 0.0028                      | Ref           | 0.4359  | 0.0011    | 0.5116           |
|              | IL-1ra               | 0.0029                      | Ref           | 1       | <0.0001   | 1                |
|              | CCL4/MIP-1 $\beta$   | 0.0021                      | Ref           | 0.0263  | <0.0001   | 1                |
|              | CCL2/MCP-1           | 0.0023                      | Ref           | <0.0001 | 0.0327    | <0.0001          |
|              | CCL3/MIP-1 $\alpha$  | 0.0023                      | Ref           | 0.0083  | <0.0001   | 0.4583           |
| <b>Box D</b> | IL-4                 | 0.0038                      | Ref           | 0.3109  | 0.2003    | 1                |
|              | MMP-9                | 0.4289                      | Ref           | 1       | 1         | 1                |
|              | IL-12 p70            | 1                           | Ref           | -       | -         | -                |

Table S4. P-values for released levels with 0.5% honey at 3 hours compared to nonstimulated controls. A Kruskal-Wallis test was used with a Bonferroni adjustment for multiple comparisons ( $\alpha=0.05$ ).

|              |                      | <i>Multiple Comparisons</i> |                      |            |                  |                         |
|--------------|----------------------|-----------------------------|----------------------|------------|------------------|-------------------------|
|              |                      | <b>Kruskal-Wallis</b>       | <b>Control Cells</b> | <b>LPS</b> | <b>LPS, fMLP</b> | <b>All four stimuli</b> |
| <b>Box A</b> | TNF- $\alpha$        | 0.0045                      | Ref                  | 1          | 0.0081           | 0.0453                  |
| <b>Box B</b> | IL-1 $\beta$         | 1                           | Ref                  | -          | -                | -                       |
|              | CCL20/MIP-3 $\alpha$ | 0.0026                      | Ref                  | 1          | <0.0001          | 1                       |
|              | CCL5/RANTES          | 0.0027                      | Ref                  | 1          | 1                | 1                       |
|              | CXCL8/IL-8           | 0.0095                      | Ref                  | 1          | 1                | 0.6693                  |
|              | Proteinase 3         | 0.0243                      | Ref                  | 1          | 1                | 1                       |
|              | MMP-1                | 0.0038                      | Ref                  | <0.0001    | <0.0001          | <0.0001                 |
|              | VEGF                 | 0.0041                      | Ref                  | 1          | 0.0001           | 0.0020                  |
| <b>Box C</b> | FGF-13               | 1                           | Ref                  | -          | -                | -                       |
|              | IL-1ra               | 0.0044                      | Ref                  | 1          | <0.0001          | 0.0387                  |
|              | CCL4/MIP-1 $\beta$   | 0.0026                      | Ref                  | 1          | <0.0001          | 1                       |
|              | CCL2/MCP-1           | 0.0031                      | Ref                  | 1          | 0.1925           | 0.0007                  |
|              | CCL3/MIP-1 $\alpha$  | 0.0026                      | Ref                  | 1          | <0.0001          | 1                       |
|              | IL-4                 | 0.0037                      | Ref                  | 1          | 0.0004           | 0.0011                  |
| <b>Box D</b> | MMP-9                | 1                           | Ref                  | -          | -                | -                       |
|              | IL-12 p70            | 1                           | Ref                  | -          | -                | -                       |

Table S5. P-values for released levels with 3% honey at 3 hours compared to nonstimulated controls. A Kruskal-Wallis test was used with a Bonferroni adjustment for multiple comparisons ( $\alpha=0.05$ ).

|              |                      | <i>Across all concentrations (Kruskal-Wallis)</i> |            |                  |                         | <i>3% compared to 0.5% honey (Multiple comparisons)</i> |            |                  |                         |
|--------------|----------------------|---------------------------------------------------|------------|------------------|-------------------------|---------------------------------------------------------|------------|------------------|-------------------------|
|              |                      | <b>Control Cells</b>                              | <b>LPS</b> | <b>LPS, fMLP</b> | <b>All four stimuli</b> | <b>Control Cells</b>                                    | <b>LPS</b> | <b>LPS, fMLP</b> | <b>All four stimuli</b> |
| <b>Box A</b> | TNF- $\alpha$        | 0.0241                                            | 0.0650     | 0.0273           | 0.0273                  | 0.0123                                                  | 0.0724     | 0.0010           | 0.0010                  |
| <b>Box B</b> | IL-1 $\beta$         | 0.3679                                            | 0.2369     | 0.0221           | 0.0986                  | 0.7997                                                  | 0.4881     | 0.0002           | 0.0878                  |
|              | CCL20/MIP-3 $\alpha$ | 0.0221                                            | 0.0459     | 0.0273           | 0.0552                  | 0.0002                                                  | 0.0140     | 0.0010           | 0.0720                  |
|              | CCL5/RANTES          | 0.0221                                            | 0.0241     | 0.0241           | 0.0241                  | 0.0002                                                  | 0.0003     | 0.0123           | 0.0003                  |
|              | CXCL8/IL-8           | 0.0273                                            | 0.1054     | 1                | 1                       | 0.0312                                                  | 0.1587     | -                | -                       |
|              | Proteinase 3         | 0.0552                                            | 0.0605     | 0.0273           | 0.0552                  | 0.0285                                                  | 0.0455     | 0.0312           | 0.0720                  |
|              | MMP-1                | 0.0204                                            | 0.0234     | 0.0249           | 0.0241                  | <0.0001                                                 | 0.0002     | 0.0004           | 0.0003                  |
|              | VEGF                 | 0.0273                                            | 0.0265     | 0.0257           | 0.0265                  | 0.0010                                                  | 0.0008     | 0.0208           | 0.0008                  |
| <b>Box C</b> | FGF-13               | 0.1054                                            | 0.0241     | 0.0234           | 0.0241                  | 0.1587                                                  | 0.0123     | 0.0089           | 0.0123                  |
|              | IL-1ra               | 0.0273                                            | 0.0265     | 0.0221           | 0.0273                  | 0.0010                                                  | 0.0257     | 0.0002           | 0.0312                  |
|              | CCL4/MIP-1 $\beta$   | 0.0241                                            | 0.0241     | 0.0273           | 0.0241                  | 0.0003                                                  | 0.0123     | 0.0312           | 0.0123                  |
|              | CCL2/MCP-1           | 0.0273                                            | 0.0273     | 0.0273           | 0.0273                  | 0.0312                                                  | 0.0312     | 0.0312           | 0.0312                  |
|              | CCL3/MIP-1 $\alpha$  | 0.0221                                            | 0.0241     | 0.0665           | 0.0241                  | 0.0002                                                  | 0.0123     | 0.0569           | 0.0123                  |
|              | IL-4                 | 0.0211                                            | 0.0257     | 0.0265           | 0.0234                  | <0.0001                                                 | 0.0208     | 0.0257           | 0.0089                  |
| <b>Box D</b> | MMP-9                | 1                                                 | 0.3679     | 1                | 1                       | -                                                       | 0.7997     | -                | -                       |
|              | IL-12 p70            | 1                                                 | 0.3679     | 1                | 1                       | -                                                       | 1          | -                | -                       |

Table S6. Part 1 of p-values for released levels between honey concentrations 0%, 0.5%, and 3% at 3 hours. A Kruskal-Wallis test was used with a Bonferroni adjustment for multiple comparisons ( $\alpha=0.05$ ).

|              |                      | <i>3% compared to 0% honey<br/>(Multiple comparisons)</i> |        |           |                  | <i>0.5% compared to 0% honey<br/>(Multiple comparisons)</i> |        |           |                  |
|--------------|----------------------|-----------------------------------------------------------|--------|-----------|------------------|-------------------------------------------------------------|--------|-----------|------------------|
|              |                      | Control Cells                                             | LPS    | LPS, fMLP | All four stimuli | Control Cells                                               | LPS    | LPS, fMLP | All four stimuli |
| <b>Box A</b> | TNF- $\alpha$        | 0.0003                                                    | 1      | 0.0312    | 0.0312           | 0.0123                                                      | 0.0540 | 0.0312    | 0.0312           |
| <b>Box B</b> | IL-1 $\beta$         | 1                                                         | 0.4881 | 1         | 0.9460           | 0.7997                                                      | 1      | 0.0002    | 0.3906           |
|              | CCL20/MIP-3 $\alpha$ | 1                                                         | 0.0709 | 0.0312    | 0.0285           | 0.0002                                                      | 0.6598 | 0.0312    | 1                |
|              | CCL5/RANTES          | 1                                                         | 0.0123 | 0.0003    | 0.0123           | 0.0002                                                      | 0.0123 | 0.0123    | 0.0123           |
|              | CXCL8/IL-8           | 0.0312                                                    | 0.1587 | -         | -                | 0.0010                                                      | 1      | -         | -                |
|              | Proteinase 3         | 1                                                         | 1      | 0.0312    | 1                | 0.0720                                                      | 0.0616 | 0.0010    | 0.0285           |
|              | MMP-1                | 0.0010                                                    | 0.0089 | 0.0163    | 0.0123           | 0.0010                                                      | 0.0089 | 0.0163    | 0.0123           |
|              | VEGF                 | 0.0312                                                    | 0.0257 | 0.0006    | 0.0257           | 0.0312                                                      | 0.0257 | 0.0208    | 0.0257           |
| <b>Box C</b> | FGF-13               | 1                                                         | 0.0003 | 0.0002    | 0.0003           | 0.1587                                                      | 0.0123 | 0.0089    | 0.0123           |
|              | IL-1ra               | 0.0312                                                    | 0.0008 | 0.0002    | 0.0010           | 0.0312                                                      | 0.0257 | 1         | 0.0312           |
|              | CCL4/MIP-1 $\beta$   | 0.0123                                                    | 0.0003 | 0.0010    | 0.0003           | 0.0123                                                      | 0.0123 | 0.0312    | 0.0123           |
|              | CCL2/MCP-1           | 0.0010                                                    | 0.0010 | 0.0010    | 0.0010           | 0.0312                                                      | 0.0312 | 0.0312    | 0.0312           |
|              | CCL3/MIP-1 $\alpha$  | 1                                                         | 0.0003 | 0.0762    | 0.0003           | 0.0002                                                      | 0.0123 | 1         | 0.0123           |
|              | IL-4                 | 0.0021                                                    | 0.0006 | 0.0008    | 0.0002           | 0.0021                                                      | 0.0208 | 0.0257    | 0.0089           |
| <b>Box D</b> | MMP-9                | -                                                         | 1      | -         | -                | -                                                           | 0.7997 | -         | -                |
|              | IL-12 p70            | -                                                         | 0.7997 | -         | -                | -                                                           | 0.7997 | -         | -                |

Table S7. Part 2 of p-values for released levels between honey concentrations 0%, 0.5%, and 3% at 3 hours. A Kruskal-Wallis test was used with a Bonferroni adjustment for multiple comparisons ( $\alpha=0.05$ ).

|              |                      | <i>Multiple Comparisons</i> |               |         |           |                  |
|--------------|----------------------|-----------------------------|---------------|---------|-----------|------------------|
|              |                      | Kruskal-Wallis              | Control Cells | LPS     | LPS, fMLP | All four stimuli |
| <b>Box A</b> | TNF- $\alpha$        | 0.0025                      | Ref           | <0.0001 | <0.0001   | 0.0007           |
| <b>Box B</b> | IL-1 $\beta$         | 0.0034                      | Ref           | 0.0004  | <0.0001   | <0.0001          |
|              | FGF-13               | 0.0071                      | Ref           | 1       | 0.0001    | 0.0032           |
|              | CCL5/RANTES          | 0.0027                      | Ref           | <0.0001 | <0.0001   | <0.0001          |
|              | CCL3/MIP-1 $\alpha$  | 0.0023                      | Ref           | 0.0005  | <0.0001   | <0.0001          |
|              | CCL4/MIP-1 $\beta$   | 0.0025                      | Ref           | 1       | 0.0011    | 0.0871           |
|              | IL-12 p70            | 0.0077                      | Ref           | <0.0001 | <0.0001   | <0.0001          |
|              | CCL2/MCP-1           | 0.0018                      | Ref           | <0.0001 | <0.0001   | <0.0001          |
|              | MMP-9                | 0.0022                      | Ref           | <0.0001 | <0.0001   | <0.0001          |
|              | MMP-1                | 0.0025                      | Ref           | 0.0040  | <0.0001   | <0.0001          |
|              | IL-1ra               | 0.0019                      | Ref           | 0.1779  | <0.0001   | <0.0001          |
|              | IL-4                 | 0.0022                      | Ref           | 0.4609  | <0.0001   | <0.0001          |
| <b>Box C</b> | CCL20/MIP-3 $\alpha$ | 0.0032                      | Ref           | <0.0001 | <0.0001   | <0.0001          |
|              | CXCL8/IL-8           | 0.0017                      | Ref           | -       | -         | -                |
|              | Proteinase 3         | 0.0020                      | Ref           | 1       | <0.0001   | 1                |
|              | VEGF                 | 0.0022                      | Ref           | 1       | <0.0001   | 1                |

Table S8. P-values for released levels with 0.5% honey at 24 hours compared to nonstimulated controls. A Kruskal-Wallis test was used with a Bonferroni adjustment for multiple comparisons ( $\alpha=0.05$ ).

|              |                      | <i>Multiple Comparisons</i> |                      |            |                  |                         |
|--------------|----------------------|-----------------------------|----------------------|------------|------------------|-------------------------|
|              |                      | <b>Kruskal-Wallis</b>       | <b>Control Cells</b> | <b>LPS</b> | <b>LPS, fMLP</b> | <b>All four stimuli</b> |
| <b>Box A</b> | TNF- $\alpha$        | 0.0038                      | Ref                  | 1          | 0.0118           | 0.1049                  |
| <b>Box B</b> | IL-1 $\beta$         | 1                           | Ref                  | -          | -                | -                       |
|              | FGF-13               | 0.1775                      | Ref                  | 1          | 1                | 1                       |
|              | CCL5/RANTES          | 0.0026                      | Ref                  | 1          | <0.0001          | 1                       |
|              | CCL3/MIP-1 $\alpha$  | 0.0251                      | Ref                  | 1          | 0.2229           | 1                       |
|              | CCL4/MIP-1 $\beta$   | 0.0317                      | Ref                  | 1          | 0.0861           | 0.0706                  |
|              | IL-12 p70            | 1                           | Ref                  | -          | -                | -                       |
|              | CCL2/MCP-1           | 0.0039                      | Ref                  | 1          | 1                | <0.0001                 |
|              | MMP-9                | 0.0523                      | Ref                  | 1          | 1                | 0.0534                  |
|              | MMP-1                | 0.0041                      | Ref                  | 0.1790     | 0.4940           | 0.4326                  |
|              | IL-1ra               | 0.0058                      | Ref                  | 1          | 0.0006           | 0.0125                  |
| IL-4         | 0.0055               | Ref                         | 1                    | 1          | 0.0227           |                         |
| <b>Box C</b> | CCL20/MIP-3 $\alpha$ | 0.0072                      | Ref                  | 1          | 0.0484           | 0.9404                  |
|              | CXCL8/IL-8           | 0.0025                      | Ref                  | -          | -                | -                       |
|              | Proteinase 3         | 0.0138                      | Ref                  | 1          | 0.3137           | 1                       |
|              | VEGF                 | 0.0179                      | Ref                  | 1          | 1                | 0.5182                  |

Table S9. P-values for released levels with 3% honey at 24 hours compared to nonstimulated controls. A Kruskal-Wallis test was used with a Bonferroni adjustment for multiple comparisons ( $\alpha=0.05$ ).

|              |                      | <i>Across all concentrations (Kruskal-Wallis)</i> |            |                  |                         | <i>3% compared to 0.5% honey (Multiple comparisons)</i> |            |                  |                         |
|--------------|----------------------|---------------------------------------------------|------------|------------------|-------------------------|---------------------------------------------------------|------------|------------------|-------------------------|
|              |                      | <b>Control Cells</b>                              | <b>LPS</b> | <b>LPS, fMLP</b> | <b>All four stimuli</b> | <b>Control Cells</b>                                    | <b>LPS</b> | <b>LPS, fMLP</b> | <b>All four stimuli</b> |
| <b>Box A</b> | TNF- $\alpha$        | 0.0329                                            | 0.0265     | 0.0439           | 0.0273                  | 0.0298                                                  | 0.0008     | 0.0043           | 0.0010                  |
| <b>Box B</b> | IL-1 $\beta$         | 1                                                 | 0.0625     | 0.0423           | 0.0241                  | -                                                       | 0.0351     | 0.0033           | 0.0123                  |
|              | FGF-13               | 0.0347                                            | 0.0241     | 0.0423           | 0.0273                  | 0.0163                                                  | 0.0123     | 0.0841           | 0.0312                  |
|              | CCL5/RANTES          | 0.0221                                            | 0.0241     | 0.0439           | 0.0241                  | 0.0002                                                  | 0.0003     | 0.1029           | 0.0123                  |
|              | CCL3/MIP-1 $\alpha$  | 0.0340                                            | 0.0241     | 0.0685           | 0.0390                  | 0.0340                                                  | 0.0123     | 0.0299           | 0.0748                  |
|              | CCL4/MIP-1 $\beta$   | 0.0265                                            | 0.0265     | 0.0439           | 0.0273                  | 0.0008                                                  | 0.0257     | 0.1029           | 0.0312                  |
|              | IL-12 p70            | 1                                                 | 0.0234     | 0.0407           | 0.0234                  | -                                                       | 0.0089     | 0.0664           | 0.0089                  |
|              | CCL2/MCP-1           | 0.0273                                            | 0.0221     | 0.0324           | 0.0221                  | 0.0312                                                  | 0.0002     | 0.0001           | 0.0002                  |
|              | MMP-9                | 0.0241                                            | 0.0241     | 0.0423           | 0.0273                  | 0.0003                                                  | 0.0123     | 0.0841           | 0.0312                  |
|              | MMP-1                | 0.0538                                            | 0.0241     | 0.0423           | 0.0265                  | 0.0266                                                  | 0.0123     | 0.0841           | 0.0257                  |
|              | IL-1ra               | 0.0390                                            | 0.0241     | 0.0324           | 0.0241                  | 0.0070                                                  | 0.0123     | 0.0001           | 0.0123                  |
| IL-4         | 0.0257               | 0.0265                                            | 0.0423     | 0.0273           | 0.0006                  | 0.0257                                                  | 0.0841     | 0.0312           |                         |
| <b>Box C</b> | CCL20/MIP-3 $\alpha$ | 0.0241                                            | 0.0273     | 0.0376           | 0.0273                  | 0.0123                                                  | 0.0010     | 0.0011           | 0.0010                  |
|              | CXCL8/IL-8           | 0.0221                                            | 1          | 1                | 1                       | 1                                                       | -          | -                | -                       |
|              | Proteinase 3         | 0.0241                                            | 0.0241     | 0.0439           | 0.0221                  | 0.0003                                                  | 0.0003     | 0.1029           | 0.0002                  |
|              | VEGF                 | 0.0608                                            | 0.0273     | 0.0423           | 0.0273                  | 0.0369                                                  | 0.0010     | 0.0841           | 0.0010                  |

Table S10. Part 1 of p-values for released levels between honey concentrations 0%, 0.5%, and 3% at 24 hours. A Kruskal-Wallis test was used with a Bonferroni adjustment for multiple comparisons ( $\alpha=0.05$ ).

|              |                      | <i>3% compared to 0% honey<br/>(Multiple comparisons)</i> |            |                  |                         | <i>0.5% compared to 0% honey<br/>(Multiple comparisons)</i> |            |                  |                         |
|--------------|----------------------|-----------------------------------------------------------|------------|------------------|-------------------------|-------------------------------------------------------------|------------|------------------|-------------------------|
|              |                      | <b>Control Cells</b>                                      | <b>LPS</b> | <b>LPS, fMLP</b> | <b>All four stimuli</b> | <b>Control Cells</b>                                        | <b>LPS</b> | <b>LPS, fMLP</b> | <b>All four stimuli</b> |
| <b>Box A</b> | TNF- $\alpha$        | 0.0034                                                    | 0.0257     | 0.1029           | 0.0312                  | 0.2344                                                      | 0.0257     | 0.0352           | 0.0312                  |
| <b>Box B</b> | IL-1 $\beta$         | -                                                         | 1          | 0.0841           | 0.0003                  | -                                                           | 0.1298     | 0.0278           | 0.0123                  |
|              | FGF-13               | 0.9890                                                    | 0.0003     | 0.0033           | 0.0010                  | 0.0055                                                      | 0.0123     | 0.0278           | 0.0312                  |
|              | CCL5/RANTES          | 1                                                         | 0.0123     | 0.0043           | 0.0003                  | 0.0002                                                      | 0.0123     | 0.0352           | 0.0123                  |
|              | CCL3/MIP-1 $\alpha$  | 0.2559                                                    | 0.0003     | 0.2334           | 0.0070                  | 0.0039                                                      | 0.0123     | 0.2914           | 0.2484                  |
|              | CCL4/MIP-1 $\beta$   | 0.0257                                                    | 0.0008     | 0.0043           | 0.0010                  | 0.0257                                                      | 0.0257     | 0.0352           | 0.0312                  |
|              | IL-12 p70            | -                                                         | 0.0002     | 0.0024           | 0.0002                  | -                                                           | 0.0089     | 0.0212           | 0.0089                  |
|              | CCL2/MCP-1           | 0.0010                                                    | 0.0002     | 0.0001           | 0.0002                  | 0.0312                                                      | 1          | 1                | 1                       |
|              | MMP-9                | 0.0123                                                    | 0.0003     | 0.0033           | 0.0010                  | 0.0123                                                      | 0.0123     | 0.0278           | 0.0312                  |
|              | MMP-1                | 1                                                         | 0.0003     | 0.0033           | 0.0008                  | 0.0677                                                      | 0.0123     | 0.0278           | 0.0257                  |
|              | IL-1ra               | 0.2484                                                    | 0.0003     | 0.0001           | 0.0003                  | 0.0748                                                      | 0.0123     | 1                | 0.0123                  |
| IL-4         | 0.0208               | 0.0008                                                    | 0.0033     | 0.0010           | 0.0208                  | 0.0257                                                      | 0.0278     | 0.0312           |                         |
| <b>Box C</b> | CCL20/MIP-3 $\alpha$ | 0.0123                                                    | 0.0312     | 0.0352           | 0.0312                  | 0.0003                                                      | 0.0312     | 0.0104           | 0.0312                  |
|              | CXCL8/IL-8           | 0.0002                                                    | -          | -                | -                       | 0.0002                                                      | -          | -                | -                       |
|              | Proteinase 3         | 0.0123                                                    | 0.0123     | 0.0043           | 0.0002                  | 0.0123                                                      | 0.0123     | 0.0352           | 1                       |
|              | VEGF                 | 1                                                         | 0.0312     | 0.0841           | 0.0312                  | 0.0901                                                      | 0.0312     | 0.0030           | 0.0312                  |

Table S11. Part 2 of p-values for released levels between honey concentrations 0%, 0.5%, and 3% at 24 hours. A Kruskal-Wallis test was used with a Bonferroni adjustment for multiple comparisons ( $\alpha=0.05$ ).

|          |              | <i>Kruskal-Wallis<br/>(across LPS; LPS, fMLP; and all four stimuli)</i> |                   |                 |
|----------|--------------|-------------------------------------------------------------------------|-------------------|-----------------|
|          |              | <b>0% honey</b>                                                         | <b>0.5% honey</b> | <b>3% honey</b> |
| <b>A</b> | CXCL8/IL-8   | 0.0687                                                                  | 0.0439            | 0.1767          |
| <b>B</b> | IL-1ra       | 0.0687                                                                  | 0.0783            | 0.0390          |
| <b>C</b> | CCL2/MCP-1   | 0.1073                                                                  | 0.0439            | 0.0556          |
| <b>D</b> | Proteinase 3 | 0.0654                                                                  | 0.0439            | 0.1968          |

Table S12. P-values for released levels of CXCL8/IL-8, IL-1ra, CCL2/MCP-1, and Proteinase 3 compared to nonstimulated control cells at 24 hours in the presence of 0, 0.5, and 3% Manuka honey, measured using a dilution factor of 200 to assay levels above the Max LOD of the earlier assay.

|          |              | <i>Across all concentrations<br/>(Kruskal-Wallis)</i> |           |                  | <i>3% compared to 0.5% honey<br/>(Multiple comparisons)</i> |           |                  |
|----------|--------------|-------------------------------------------------------|-----------|------------------|-------------------------------------------------------------|-----------|------------------|
|          |              | LPS                                                   | LPS, fMLP | All four stimuli | LPS                                                         | LPS, fMLP | All four stimuli |
| <b>A</b> | CXCL8/IL-8   | 0.7897                                                | 0.0439    | 0.1335           | 1                                                           | 0.0040    | 1                |
| <b>B</b> | IL-1ra       | 0.0439                                                | 0.0439    | 0.0439           | 0.1029                                                      | 0.0040    | 0.0352           |
| <b>C</b> | CCL2/MCP-1   | 0.0541                                                | 0.0423    | 0.0742           | 0.1080                                                      | 0.0030    | 0.0450           |
| <b>D</b> | Proteinase 3 | 0.0423                                                | 0.0984    | 0.0766           | 0.0033                                                      | 0.1209    | 0.0898           |

Table S13. Part 1 of p-values for released levels between honey concentrations 0%, 0.5%, and 3% at 24 hours for released levels of CXCL8/IL-8, IL-1ra, CCL2/MCP-1, and Proteinase 3, measured using a dilution factor of 200 to assay levels above the Max LOD of the earlier assay. A Kruskal-Wallis test was used with a Bonferroni adjustment for multiple comparisons ( $\alpha=0.05$ ).

|          |              | <i>3% compared to 0% honey<br/>(Multiple comparisons)</i> |           |                  | <i>0.5% compared to 0% honey<br/>(Multiple comparisons)</i> |           |                  |
|----------|--------------|-----------------------------------------------------------|-----------|------------------|-------------------------------------------------------------|-----------|------------------|
|          |              | LPS                                                       | LPS, fMLP | All four stimuli | LPS                                                         | LPS, fMLP | All four stimuli |
| <b>A</b> | CXCL8/IL-8   | 1                                                         | 0.1029    | 0.1811           | 1                                                           | 0.1029    | 0.2304           |
| <b>B</b> | IL-1ra       | 0.0040                                                    | 0.1029    | 0.1029           | 0.1029                                                      | 0.1029    | 0.0043           |
| <b>C</b> | CCL2/MCP-1   | 0.1029                                                    | 0.0841    | 1                | 0.5241                                                      | 0.0841    | 0.1404           |
| <b>D</b> | Proteinase 3 | 0.0278                                                    | 0.1498    | 1                | 0.0841                                                      | 1         | 0.0645           |

Table S14. Part 2 of p-values for released levels between honey concentrations 0%, 0.5%, and 3% at 24 hours for released levels of CXCL8/IL-8, IL-1ra, CCL2/MCP-1, and Proteinase 3, measured using a dilution factor of 200 to assay levels above the Max LOD of the earlier assay. A Kruskal-Wallis test was used with a Bonferroni adjustment for multiple comparisons ( $\alpha=0.05$ ).
